# Supplementary material
Source: publisher figshare collection journal article supplement (https://gsajournals.figshare.com/ndownloader/files/22441535)
Supplement: Supplementary file 1 [file 22441535]

## Sheet: Kankel et al Table S2
Column A	Column B	Column C	Column D	Column E	Column F	Column G	Column H
Drosophila RBP Gene	Human Ortholog	Exelixis Insert	GMR-hTDP-43 Validated Modification	GMR-hFUS Validation Modification	C9orf72(G4C2)30 Modification	Panther/Flybase RBP Annotations	Panther Protein Subclass Annotations
orb	CPEB1	d06989	S2	E3	Not Tested	RRM	mRNA polyadenylation factor
barc	HTATSF1	d03144	E3	E2	Not Tested	RRM	mRNA splicing factor
Imp	IGF2BP2	d04757	S3	S3	Not Tested	RRM	mRNA splicing factor
tra2	TRA2B	d10032	E3	E2	Not Tested	RRM	mRNA splicing factor
lark	RBM4B	d04807	E3	E3	Not Tested	RRM	mRNA splicing factor
SF2	SRSF1	d03595	E3	E3	Not Tested	RRM	mRNA splicing factor
A2bp1/Rbfox1	RBFOX2	d10152	S2	E2	Not Tested	RRM
CG11505	LARP4	f07116	E3	E2	Not Tested	RRM
fus	ESRP1	d08566	S1	S1	Not Tested	RRM
LS2	U2AF2	d07463	E2	E2	Not Tested	RRM
mub	PCBP3	d01447/f06188	E2/S1	E1/S1	Not Tested	KH Domain	mRNA splicing factor
ps	NOVA2	e01388	E2	E3	Not Tested	KH Domain	mRNA splicing factor
BicC	BICC1	d04728	E1	E2	Not Tested	KH Domain
bl/hnRNP-k	hnRNP-K	d11391	E2	E2	S3	KH Domain
Tis11	ZFP36L1	d00685	E3	E2	Not Tested	mRNA 3'-UTR Binding
Cpsf160	CPSF1	f05121	#N/A	E1	Not Tested	mRNA 3'-UTR Binding	mRNA polyadenylation factor
Rat1	XRN2	d10687	S3	S3	Not Tested	mRNA processing
Prp18	PRPF18	c07155	S2	S2	No Effect	Pre-mRNA processing factor	mRNA splicing factor
pum	PUM2	d03766/d04225	E2/E3	E2/E3	Not Tested	Pumillio RNA-binding repeat
larp	LARP1B	f06985	S2	#N/A	Not Tested	Ribonucleoprotein
CG11700	UBB	d03818	S3	E2	Not Tested	Ribosomal Protein
RpS16	RPS16	f06593	S3	S3	S3	Ribosomal Protein
RpS2	RPS2	d05318	#N/A	S1	Not Tested	Ribosomal Protein
glo	HNRNPH1	f02674	E2	S2	Not Tested	Ribosomal Protein
su(w[a])	SFSWAP	d07578	E2	S3	Not Tested	RNA binding	mRNA splicing factor
Atx-1	ATXN1	f01201	S2	S2	E3	RNA binding
bel	DDX3Y	d01623	S2	S1	Not Tested	RNA helicase DEAD-box
CG10777	DDX5	d00366	E3	E2	Not Tested	RNA helicase DEAD-box
CG5800	DDX10	d10824	E3	E2	Not Tested	RNA helicase DEAD-box
mus301	HELQ	f05408	S3	S2	S3	DEAD/DEAH box helicase
ldbr	DBR1	d00740	E3	E3	Not Tested	RNA lariat debranching enzyme activity
Ef1alpha48D	EEF1A2	d10427	E2	E2	Not Tested	Translation elongation factor
eIF-4E	EIF4E	d03437	E2	E2	Not Tested	Translation initiation factor
eIF5B	EIF5B	d02986	S2	S2	E2	Translation initiation factor
Pdcd4	PDCD4	d00598	E2	E2	Not Tested	Translation initiation factor
CG9769	EIF3F	d05711	S1	S1	Not Tested	Translation initiation factor
CG33158	EFL1	d07163/f05982	S1/S1	S2/S1	Not Tested	Translation initiation/elongation factor

## Sheet: Kankel et al Table S2 Legend
Table S2. RNA Binding Proteins that modify GMR-hFUSR521C and/or GMR-hTDP-43 degenerative eye phenotypes. The table lists the Drosophila gene (Column A), the human ortholog (Column B), the Exelixis strain number (Column C), and the modification effect in the GMR-hTDP-43M337V (Column D), GMR-hFUSR521C (Column E) and GMR-c9orf72(G4C2)30 (Column F) backgrounds. For Columns D and E, an “E” represents …
